# Supplementary material for: Butyrate-producing bacteria supplemented in vitro to Crohn’s disease patient microbiota increased butyrate production and enhanced intestinal epithelial barrier integrity
Source: PubMed Central journal article supplement (PMC5597586; doi:10.1038/s41598-017-11734-8), 2017-09-13
Supplement: 41598_2017_11734_MOESM1_ESM.pdf [file 41598_2017_11734_MOESM1_ESM.pdf]

## SUPPLEMENTARY INFORMATION

### **Butyrate-producing bacteria supplemented *in vitro* to Crohn's disease patient microbiota increased butyrate production and enhanced intestinal epithelial barrier integrity**

Annelies Geirnaert <sup>a, b†</sup>, Marta Calatayud <sup>a†</sup>, Charlotte Grootaert <sup>c</sup>, Debby Laukens <sup>d</sup>, Sarah Devriese <sup>d</sup>, Guy Smaghe <sup>e</sup>, Martine De Vos <sup>d</sup>, Nico Boon <sup>a</sup> and Tom Van de Wiele <sup>a\*</sup>

<sup>a</sup> Center of Microbial Ecology and Technology (CMET), Ghent University, Coupure Links 653, 9000 Ghent, Belgium;

<sup>b</sup> Current address: Laboratory of Food Biotechnology, ETH Zürich, 8092 Zürich, Switzerland;

<sup>c</sup> Laboratory of Food Chemistry and Human Nutrition, Ghent University, Coupure Links 653, 9000 Ghent, Belgium;

<sup>d</sup> Department of Gastroenterology, Ghent University, 9000 Ghent, Belgium

<sup>e</sup> Department of Crop Protection, Ghent University, 9000 Ghent, Belgium

† These authors contributed equally to this article.

\* Corresponding author: Tom Van de Wiele, CMET – UGent. Coupure Links 653, B-9000 Ghent, Belgium. Phone: +32 9 264 59 76. Fax: + 32 9 264 62 48. E-mail: tom.vandewiele@ugent.be

**Supplementary table 1**

|      |         | A1          |             | A2          |              | A3          |             | A4          |             | A5          |             |
|------|---------|-------------|-------------|-------------|--------------|-------------|-------------|-------------|-------------|-------------|-------------|
|      |         | Lumen       | Mucus       | Lumen       | Mucus        | Lumen       | Mucus       | Lumen       | Mucus       | Lumen       | Mucus       |
| IV   | Control | 5.53 ± 0.00 | -           | 4.93 ± 0.04 | 4.01 ± 0.47  | 7.04 ± 0.07 | 6.72 ± 0.03 | 6.40 ± 0.06 | 6.46 ± 0.00 | 7.43 ± 0.01 | 7.84 ± 0.03 |
|      | BP 25-3 | 5.73 ± 0.04 | 3.88 ± 0.00 | 5.33 ± 0.01 | 4.32 ± 0.21  | 7.09 ± 0.00 | 6.95 ± 0.04 | 7.09 ± 0.05 | 6.24 ± 0.40 | 7.82 ± 0.09 | 8.08 ± 0.05 |
|      | BP 1.20 | 5.98 ± 0.03 | 5.84 ± 0.04 | 4.97 ± 0.23 | 3.90 ± 0.00  | 6.50 ± 0.12 | 6.61 ± 0.03 | 6.82 ± 0.06 | 5.82 ± 0.38 | 7.44 ± 0.07 | 8.02 ± 0.01 |
|      | FP      | 5.99 ± 0.07 | 4.69 ± 0.30 | 5.67 ± 0.02 | -            | 7.02 ± 0.00 | 6.24 ± 0.04 | 8.13 ± 0.04 | 6.55 ± 0.02 | 7.26 ± 0.03 | 7.54 ± 0.03 |
|      | MIX     | 5.65 ± 0.40 | 5.99 ± 0.00 | 3.91 ± 0.22 | 4.01 ± 0.30  | 6.90 ± 0.12 | 6.91 ± 0.01 | 7.41 ± 0.02 | 6.06 ± 0.06 | 7.82 ± 0.04 | 7.69 ± 0.06 |
| XIVa | Control | 4.02 ± 0.08 | 4.28 ± 0.10 | 3.96 ± 0.46 | 4.21 ± 0.02  | 9.03 ± 0.10 | 8.64 ± 0.08 | 8.24 ± 0.09 | 7.29 ± 0.00 | 8.46 ± 0.04 | 8.47 ± 0.07 |
|      | BP 25-3 | 3.51 ± 0.19 | 3.56 ± 0.08 | 4.05 ± 0.10 | 5.14 ± 0.07  | 9.14 ± 0.02 | 8.54 ± 0.05 | 8.46 ± 0.04 | 7.71 ± 0.04 | 8.55 ± 0.03 | 8.50 ± 0.10 |
|      | BP 1.20 | 4.45 ± 0.12 | 3.79 ± 0.53 | 3.41 ± 0.11 | 5.81 ± 0.06  | 8.74 ± 0.02 | 8.33 ± 0.05 | 8.41 ± 0.03 | 7.60 ± 0.04 | 8.47 ± 0.04 | 8.49 ± 0.07 |
|      | FP      | 4.30 ± 0.13 | 3.67 ± 0.12 | 4.80 ± 0.03 | 4.67 ± 0.27  | 9.26 ± 0.02 | 7.43 ± 0.09 | 8.32 ± 0.04 | 7.24 ± 0.07 | 8.40 ± 0.02 | 7.53 ± 0.08 |
|      | MIX     | 4.02 ± 0.04 | 5.07 ± 0.00 | 3.86 ± 0.05 | 4.98 ± 0.08  | 9.19 ± 0.01 | 8.60 ± 0.05 | 8.67 ± 0.03 | 7.35 ± 0.02 | 8.43 ± 0.02 | 7.93 ± 0.19 |
|      |         | R1          |             | R2          |              | R3          |             | R4          |             | R5          |             |
|      |         | Lumen       | Mucus       | Lumen       | Mucus        | Lumen       | Mucus       | Lumen       | Mucus       | Lumen       | Mucus       |
| IV   | Control | 7.40 ± 0.09 | 6.60 ± 0.00 | 6.35 ± 0.14 | 6.23 ± 0.01  | 6.98 ± 0.09 | 7.11 ± 0.08 | 6.78 ± 0.02 | 7.04 ± 0.06 | 8.84 ± 0.03 | 8.63 ± 0.05 |
|      | BP 25-3 | 7.23 ± 0.01 | 6.08 ± 0.05 | 6.56 ± 0.02 | 6.70 ± 0.06  | 7.22 ± 0.26 | 7.25 ± 0.06 | 6.75 ± 0.00 | 6.81 ± 0.07 | 8.86 ± 0.03 | 8.39 ± 0.05 |
|      | BP 1.20 | 7.18 ± 0.04 | 6.37 ± 0.03 | 6.45 ± 0.06 | 6.53 ± 0.02  | 7.20 ± 0.03 | 6.57 ± 0.00 | 8.05 ± 0.02 | 7.20 ± 0.04 | 8.58 ± 0.05 | 7.59 ± 0.02 |
|      | FP      | 7.50 ± 0.07 | 6.91 ± 0.06 | 6.93 ± 0.28 | 6.82 ± 0.01  | 7.03 ± 0.06 | 7.19 ± 0.01 | 8.05 ± 0.02 | 7.48 ± 0.06 | 8.84 ± 0.05 | 8.84 ± 0.05 |
|      | MIX     | 7.21 ± 0.03 | 6.94 ± 0.06 | 6.47 ± 0.04 | 6.32 ± 0.04  | 7.30 ± 0.03 | 7.06 ± 0.04 | 7.97 ± 0.04 | 8.99 ± 0.04 | 8.67 ± 0.08 | 8.67 ± 0.08 |
| XIVa | Control | 9.05 ± 0.04 | 8.58 ± 0.01 | 9.17 ± 0.00 | 8.86 ± 0.04  | 8.52 ± 0.01 | 9.66 ± 0.07 | 9.38 ± 0.01 | 8.47 ± 0.05 | 8.99 ± 0.02 | 7.91 ± 0.05 |
|      | BP 25-3 | 9.12 ± 0.05 | 8.16 ± 0.02 | 9.12 ± 0.03 | 9.59 ± 0.05  | 8.64 ± 0.04 | 9.28 ± 0.14 | 9.30 ± 0.02 | 8.28 ± 0.02 | 8.88 ± 0.06 | 8.37 ± 0.05 |
|      | BP 1.20 | 9.01 ± 0.04 | 8.71 ± 0.03 | 9.06 ± 0.01 | 10.54 ± 0.16 | 8.51 ± 0.07 | 8.09 ± 0.30 | 9.17 ± 0.04 | 8.36 ± 0.02 | 8.54 ± 0.04 | -           |
|      | FP      | 9.06 ± 0.06 | 8.46 ± 0.00 | 9.33 ± 0.01 | 10.02 ± 0.09 | 8.55 ± 0.01 | 8.51 ± 0.05 | 9.17 ± 0.04 | 8.09 ± 0.02 | 8.67 ± 0.02 | 8.67 ± 0.02 |
|      | MIX     | 9.08 ± 0.04 | 9.02 ± 0.06 | 9.28 ± 0.02 | 9.21 ± 0.04  | 8.63 ± 0.04 | 7.86 ± 0.03 | 8.81 ± 0.01 | -           | 8.42 ± 0.01 | 8.42 ± 0.01 |

**Supplementary Table 1** Concentration of Clostridial cluster IV and cluster XIVa in log copies/mL in lumen- and mucus-associated microbiota of five active CD (A) and five remissive CD (R) samples 65h after start incubation and treatment. Values are averages of technical replicates (n=3) ± standard deviation. Light grey boxes indicate a higher concentration in treated sample compared to non-treated control; dark grey boxes indicate a difference with control of at least 1 log unit.

**Supplementary Table 2**

| <b>Label</b> | <b>Gender</b> | <b>Age</b> | <b>Location of the disease</b> | <b>WBC feces</b> | <b>CRP blood (mg/L)</b> | <b>Medical therapy</b>                 |
|--------------|---------------|------------|--------------------------------|------------------|-------------------------|----------------------------------------|
| <b>A 1</b>   | F             | 36         | Colonic                        | 21.164           | -                       | Immunosuppressive drug                 |
| <b>A 2</b>   | F             | 57         | Ileocolonic                    | -                | -                       | Mesalamine                             |
| <b>A 3</b>   | F             | 28         | Ileocolonic                    | -                | 15,9                    | Immunosuppressive drug                 |
| <b>A 4</b>   | F             | 13         | Ileocolonic                    | 115.506          | 30,8                    | Nutritional therapy, Immunosuppressive |
| <b>A 5</b>   | M             | 14         | Pancolitic                     | 511.341          | 26,9                    | none                                   |
| <b>R 1</b>   | F             | -          | -                              | -                | -                       | Anti-tumor necrosis factor alpha       |
| <b>R 2</b>   | M             | 20         | -                              | 4.503            | -                       | Immunosuppressive drug; Mesalamine     |
| <b>R 3</b>   | F             | 26         | Ileal                          | 3.364            | -                       | none                                   |
| <b>R 4</b>   | F             | 43         | -                              | 5.720            | -                       | none                                   |
| <b>R 5</b>   | F             | 64         | -                              | 3.598            | -                       | Immunosuppressive drug                 |

*Supplementary Table 2 Metadata of Crohn's disease patients used for fecal sample collection. WBC: White Blood Cell count in fecal suspension. CRP: C-Reactive Protein levels blood.*

Supplementary table 3

| Target group                                    | Short name                  | Primer         | Use      | Sequence (5'→3')                                                                                | Annealing T (°C) | Fragment size | Reference |
|-------------------------------------------------|-----------------------------|----------------|----------|-------------------------------------------------------------------------------------------------|------------------|---------------|-----------|
| Clostridium leptum group                        | Clept group/<br>Cluster IV  | Sg-Clept-F     | PCR-DGGE | CGCCCGCCGCGCGCGGGCGG<br>GCGGGGCGGGGGCACGGG<br>GGG<br><b>GCACAAGCAGTGGAGT</b>                    | 50               | 239 bp        | 50        |
|                                                 |                             | Sg-clept-R3-GC |          | CTT CCT CCG TTT TGT CAA                                                                         |                  |               |           |
|                                                 |                             | Clept-f        | qPCR     | GCA CAA GCA GTG GAG T<br>(Tm 49)                                                                | 50               | 239 bp        | 51        |
|                                                 |                             | Clept-R3       |          | CTTCCTCCGTTTTGTCAA<br>(Tm 53)                                                                   |                  |               |           |
| Eubacterium rectale-<br>Blautia coccoides group | Erec group/<br>Cluster XIVa | Cocc-f         | PCR-DGGE | AAA TGA CGG TAC CTG<br>ACT AA                                                                   | 54               | 440 bp        | 52        |
|                                                 |                             | Cocc-r+GC      |          | CGCCCGGGGCGCGCCCCGG<br>GCGGGGCGGGGGCACGGG<br>GGG <b>CTT TGA GTT TCA</b><br><b>TTC TTG CGA A</b> |                  |               | 53        |
|                                                 |                             | g-Ccoc-f       | qPCR     | AAA TGA CGG TAC CTG<br>ACT AA (Tm 51)                                                           | 50               | 440 bp        | 51        |
|                                                 |                             | g-Ccoc-r       |          | CTT TGA GTT TCA TTC TTG<br>CGA A (Tm 58)                                                        |                  |               |           |

Supplementary Table 3 Primers used for PCR-DGGE and qPCR

**Supplementary table 4**

| <b>Protocol</b>          | <b>Polyacrylamide<br/>% (w/v)</b> | <b>Gradient<sup>1</sup></b> | <b>DGGE system</b> | <b>Run conditions</b> |
|--------------------------|-----------------------------------|-----------------------------|--------------------|-----------------------|
| Total bacteria           | 8%                                | 45% - 60%                   | PhorU Ingeny       | 120 V – 60°C – 16h    |
| Clostridial cluster IV   | 8%                                | 30% - 52,5 %                | DCode Bio-Rad      | 200 V – 60°C – 4h     |
| Clostridial cluster XIVa | 6%                                | 38% - 60%                   | PhorU Ingeny       | 120 V – 60°C – 16h    |

<sup>1</sup> Denaturing gradient: 100% is 7 M urea and 40% formamide

*Supplementary Table 4 DGGE conditions.*

**Supplementary table 5**

| <b>Patient</b> | <b>Sample</b> | <b>pH</b> | <b>Total SCFA<br/>(mM)</b> | <b>Acetate<br/>(mM)</b> | <b>Propionate<br/>(mM)</b> | <b>Butyrate<br/>(mM)</b> |
|----------------|---------------|-----------|----------------------------|-------------------------|----------------------------|--------------------------|
| <b>A 3</b>     | CON           | 6.45      | 49.4                       | 29.4                    | 9.2                        | 8.5                      |
|                | BP 25-3       | 6.27      | 40.4                       | 23.2                    | 7.9                        | 7.9                      |
|                | MIX           | 6.31      | 40.5                       | 23.2                    | 6.9                        | 10.0                     |
| <b>A 4</b>     | CON           | 6.23      | 14.3                       | 11.0                    | 3.2                        | 0.0                      |
|                | BP 25-3       | 6.31      | 18.0                       | 12.5                    | 5.1                        | 0.3                      |
|                | MIX           | 6.29      | 18.2                       | 11.1                    | 3.7                        | 3.2                      |
| <b>A 5</b>     | CON           | 6.17      | 38.2                       | 23.0                    | 8.3                        | 5.4                      |
|                | BP 25-3       | 6.19      | 42.3                       | 26.4                    | 8.7                        | 5.6                      |
|                | MIX           | 6.28      | 32.2                       | 16.9                    | 7.2                        | 7.1                      |
| <b>R 2</b>     | CON           | 6.20      | 41.1                       | 29.6                    | 6.5                        | 4.7                      |
|                | BP 25-3       | 6.08      | 42.4                       | 30.9                    | 7.0                        | 4.3                      |
|                | MIX           | 6.16      | 40.5                       | 26.6                    | 7.0                        | 6.6                      |
| <b>R3</b>      | CON           | -         | 38.2                       | 23.1                    | 7.3                        | 5.7                      |
|                | BP 25-3       | 6.37      | 41.2                       | 24.9                    | 8.1                        | 6.0                      |
|                | MIX           | 6.33      | 41.4                       | 23.8                    | 8.0                        | 8.0                      |
| <b>R4</b>      | CON           | 6.13      | 38.0                       | 22.8                    | 8.7                        | 6.3                      |
|                | BP 25-3       | 6.26      | 35.0                       | 21.6                    | 8.2                        | 5.1                      |
|                | MIX           | 6.27      | 41.1                       | 23.5                    | 9.2                        | 8.3                      |

*Supplementary Table 5 Characteristics of undiluted supernatant samples of fed batch system of CD microbiota incubated for 42h and used in Caco-2 cell assays. (- : sample not analyzed)*
